# Supplementary material for: The Recognition Pathway of the SARS-CoV-2 Spike Receptor-Binding Domain to Human Angiotensin-Converting Enzyme 2
Source: MDPI journal article supplement (doi:10.3390/molecules29081875), 2024-04-19
Supplement: s1 [file s1]

Supplementary Materials

# **The Recognition Pathway of the SARS-CoV-2 Spike Receptor-Binding Domain to Human Angiotensin-Converting Enzyme 2**

**Can Peng <sup>1</sup>, Xinyue Lv <sup>1</sup>, Zhiqiang Zhang <sup>2</sup>, Jianping Lin <sup>1,\*</sup> and Dongmei Li <sup>1,\*</sup>**

<sup>1</sup> State Key Laboratory of Medicinal Chemical Biology, College of Pharmacy and Tianjin Key Laboratory of Molecular Drug Research, Nankai University, Haihe Education Park, 38 Tongyan Road, Tianjin 300350, China; 2120211306@mail.nankai.edu.cn (C.P.); 2120211384@mail.nankai.edu.cn (X.L.)

<sup>2</sup> Xiongan Institute of Innovation, Xiong'an New Area 070001, China; zhangzhiqiang@xii.ac.cn

\* Correspondence: jianpinglin@nankai.edu.cn (J.L.); dongmeili@nankai.edu.cn (D.L.)

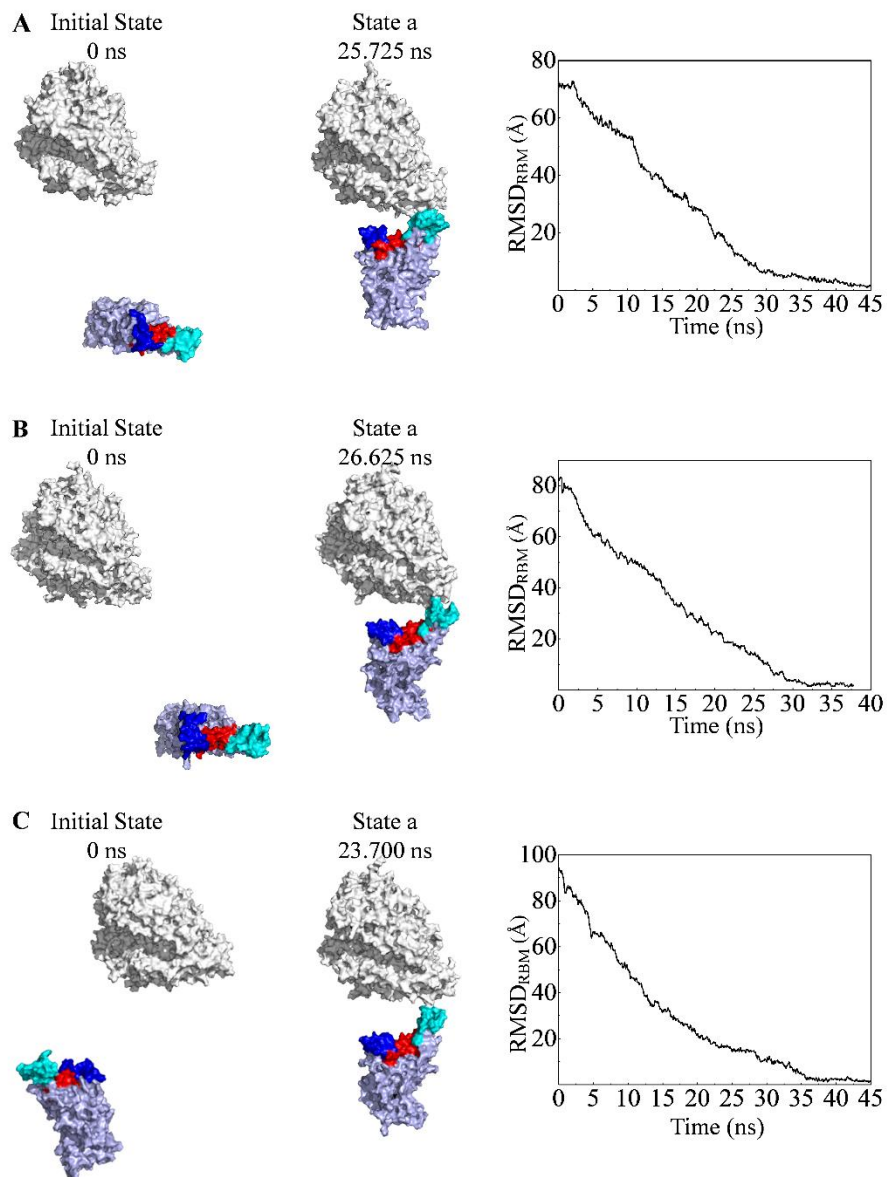

**Figure S1.** The initial state, State a and the time-dependent RMSD<sub>RBM</sub> of the Su-GaMD simulations from three different starting points for the recognition process of RBD<sub>WT</sub> to ACE2.

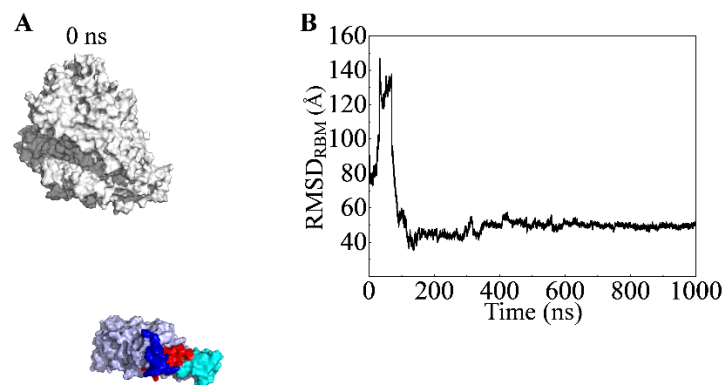

**Figure S2.** (A) The starting point (which is the same as in Figure 2A) and (B) the time-dependent RMSD<sub>RBM</sub> of the 1000-ns cMD simulation for the recognition process of RBD<sub>WT</sub> to ACE2.

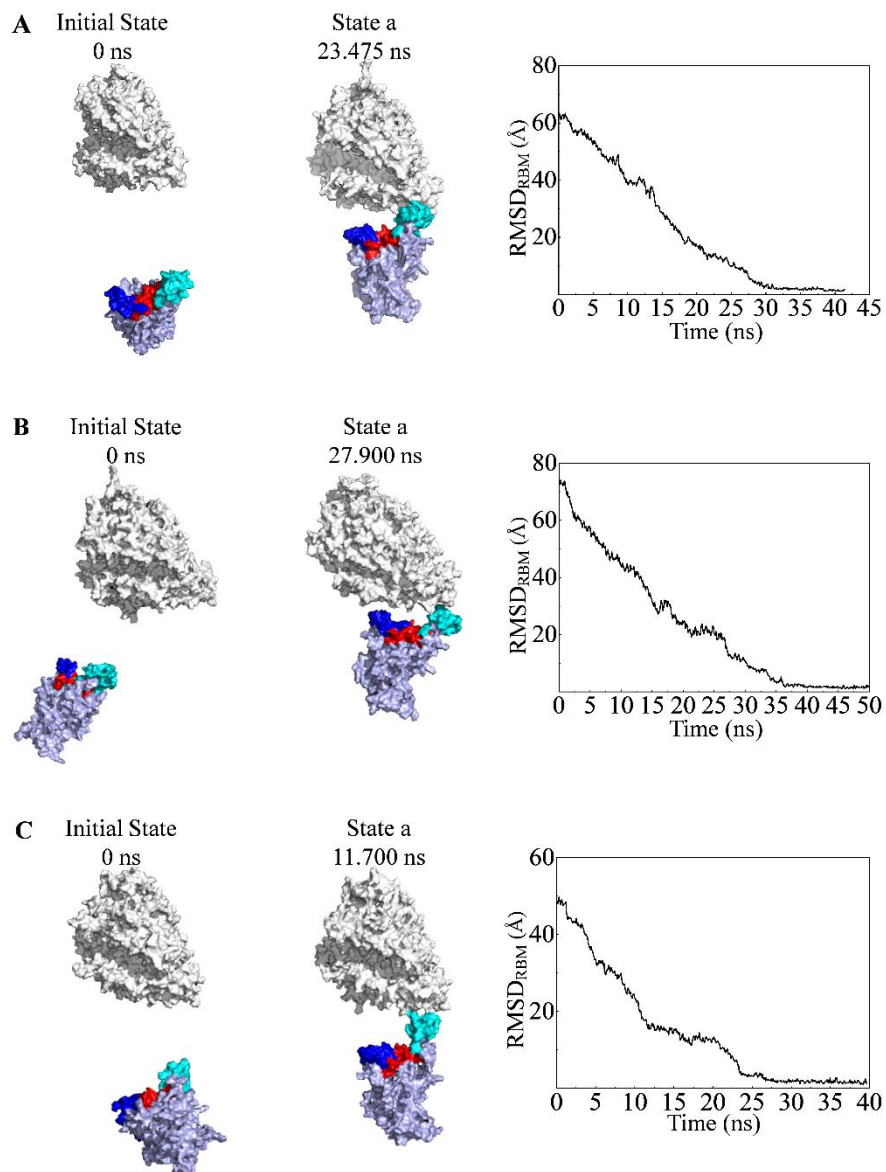

**Figure S3.** The initial state, State a and the time-dependent  $\text{RMSD}_{\text{RBM}}$  of the Su-GaMD simulations from three different starting points for the recognition process of  $\text{RBD}_{\text{Delta}}$  to ACE2.

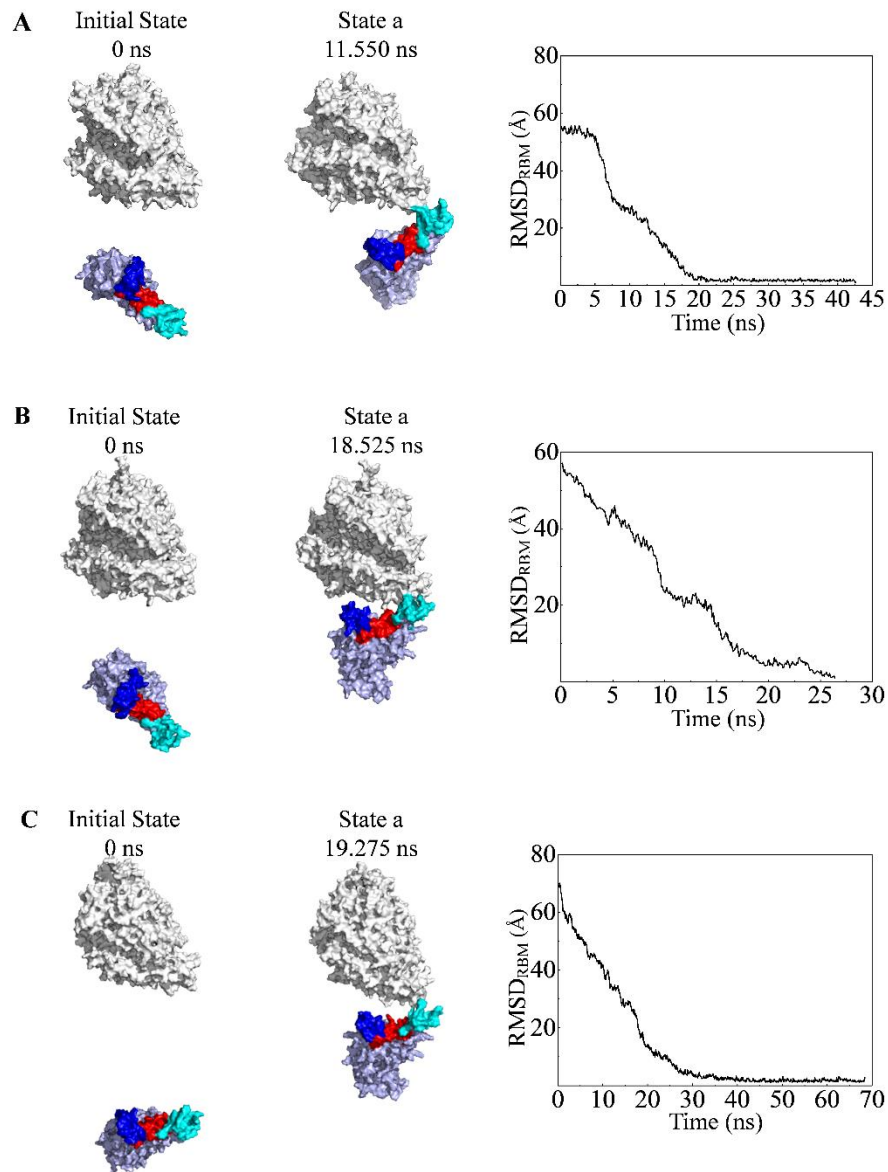

**Figure S4.** The initial state, State a and the time-dependent RMSD<sub>RBM</sub> of the Su-GaMD simulations from three different starting points for the recognition process of RBD<sub>OmicronBA.2</sub> to ACE2.

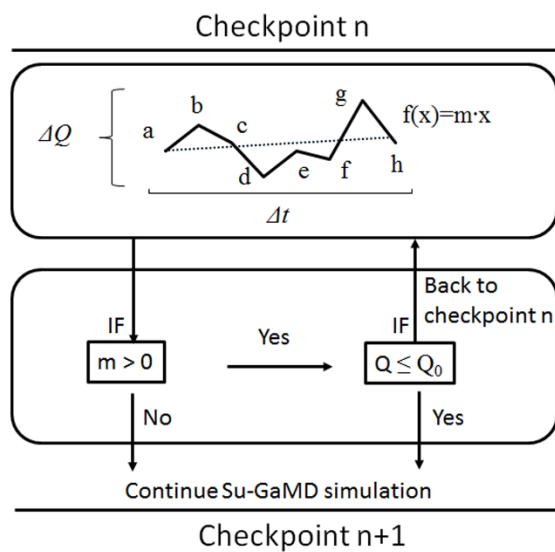

**Figure S5.** Workflow of the Su-GaMD simulation.
