# Supplementary material for: The Recognition Pathway of the SARS-CoV-2 Spike Receptor-Binding Domain to Human Angiotensin-Converting Enzyme 2
Source: Molecules. 2024 Apr 19;29(8):1875. doi: 10.3390/molecules29081875 (PMC11054751; doi:10.3390/molecules29081875)
Supplement: Supplementary file 1 [file molecules-29-01875-s001.zip]

Archive with 4 entries (4 files):
- Molecules-SI-rev.pdf
- movieS1.mp4
- movieS2.mp4
- movieS3.mp4
